# Supplementary material for: An applicable orthotropic creep model for wood materials and composites
Source: Springer Nature journal article supplement (doi:10.1007/s00226-022-01421-x), 2022-11-01
Supplement: MOESM1 [file 23665304]

## Supplementary Material

Below tables are the following model parameters obtained from the calibration against experimental data using different assumptions of time-dependencies of the Poisson's ratios.

**Table A1** Model parameters with fully time-dependent Poisson's ratio calibrated against experimental data from [Ozyhar et al \(2013\)](#).

|     | $C_{ij}^\infty$ | $C_{ij}^1$  | $\tau_{ij}^1$ | $C_{ij}^2$ | $\tau_{ij}^2$ |
|-----|-----------------|-------------|---------------|------------|---------------|
| C11 | 1.0005e+04      | -1.0041e+03 | 42.4188       | 500        | 0.7000        |
| C22 | 1.4572e+03      | -106.5474   | 4.7219        | 200        | 0.7000        |
| C33 | 4.54039e+02     | -52.0963    | 5.4197        | 70         | 0.9000        |
| C12 | 9.665098e+02    | -752.7552   | 11.3303       | 0          | 0             |
| C13 | 4.642879e+02    | -415.7962   | 10.7992       | 0          | 0             |
| C23 | 3.613703e+02    | -149.4332   | 7.7182        | 0          | 0             |

**Table A2** Model parameters with constant Poisson's ratio calibrated against experimental data from [Ozyhar et al \(2013\)](#).

|     | $C_{ij}^\infty$ | $C_{ij}^1$  | $\tau_{ij}^1$ | $C_{ij}^2$ | $\tau_{ij}^2$ |
|-----|-----------------|-------------|---------------|------------|---------------|
| C11 | 8.7531e+03      | 5.6942e+02  | 6.3518e-01    | 4.0182e+02 | 1.2068e+01    |
| C22 | 0               | 1.7520e+02  | 1.0100e+00    | 1.3880e+03 | 3.2165e+02    |
| C33 | 0               | 5.3150e+01  | 1.0837e+00    | 4.5400e+02 | 6.8446e+02    |
| C12 | -2.9452e+04     | 3.8940e+01  | 1.0127e+00    | 2.9997e+04 | 2.4203e+05    |
| C13 | 2.4926e+02      | -6.9845e+02 | 3.0455e+00    | 7.0612e+02 | 2.9397e+00    |
| C23 | 3.2271e+02      | -1.8541e+03 | 3.0072e+00    | 1.8644e+03 | 2.9556e+00    |

2 *An applicable orthotropic creep modelling approach***Table A3** Model parameters with constant  $\nu_{RL}$ ,  $\nu_{TL}$  and  $\nu_{RT}$  Poisson's ratio calibrated against experimental data from [Ozyhar et al \(2013\)](#).

|     | $C_{ij}^\infty$ | $C_{ij}^1$  | $\tau_{ij}^1$ | $C_{ij}^2$  | $\tau_{ij}^2$ |
|-----|-----------------|-------------|---------------|-------------|---------------|
| C11 | 9.3917e+03      | -5.3884e+02 | 1.2488e+01    | 9.0000e+02  | 7.0000e-01    |
| C22 | 1.4206e+03      | -1.8298e+02 | 2.3663e+00    | 2.8437e+02  | 1.0078e+00    |
| C33 | 4.7497e+02      | -9.8711e+01 | 2.9622e+00    | 200         | 8.0000e-01    |
| C12 | 1.0389e+03      | 3.8923e+01  | 3.6600e-03    | -7.4112e+02 | 1.0466e+01    |
| C13 | 5.1749e+02      | -4.0014e+02 | 1.0459e+01    | 4.4728e+01  | 7.8805e-03    |
| C23 | 3.8293e+02      | 1.3983e+02  | 2.1151e+01    | -2.4460e+02 | 1.1126e+01    |

**Table A4** Model parameters with fully time-dependent Poisson's ratio calibrated against experimental data of [Endo and de Carvalho Pereira \(2017\)](#).

|     | $C_{ij}^\infty$ | $C_{ij}^1$ | $\tau_{ij}^1$ | $C_{ij}^2$ | $\tau_{ij}^2$ |
|-----|-----------------|------------|---------------|------------|---------------|
| C11 | 7.2133e+03      | 2.1921e+04 | 2.2372e+04    | 2.0553e+03 | 4.4147e+05    |
| C22 | 5.3423e+03      | 1.6586e+04 | 2.8026e+04    | 1.7643e+03 | 4.8026e+05    |
| C33 | 5.3423e+03      | 1.6586e+04 | 2.8026e+04    | 1.7643e+03 | 4.8026e+05    |
| C12 | 3.2064e+03      | 1.7445e+04 | 2.3429e+04    | 1.1532e+03 | 4.2744e+05    |
| C13 | 3.2064e+03      | 1.7445e+04 | 2.3429e+04    | 1.1532e+03 | 4.2744e+05    |
| C23 | 2.6022e+03      | 1.4106e+04 | 2.4836e+04    | 9.7323e+02 | 4.4546e+05    |

**Table A5** Model parameters with constant Poisson's ratio calibrated against experimental data of [Endo and de Carvalho Pereira \(2017\)](#).

|     | $C_{ij}^\infty$ | $C_{ij}^1$ | $\tau_{ij}^1$ | $C_{ij}^2$ | $\tau_{ij}^2$ |
|-----|-----------------|------------|---------------|------------|---------------|
| C11 | 9.3090e+03      | 1.4087e+04 | 3.7530e+04    | 2.6432e+03 | 5.5428e+05    |
| C22 | 6.4878e+03      | 1.4240e+04 | 3.8164e+04    | 2.1354e+03 | 5.6808e+05    |
| C33 | 6.4878e+03      | 1.4240e+04 | 3.8164e+04    | 2.1354e+03 | 5.6808e+05    |
| C12 | 4.9038e+03      | 1.2089e+04 | 3.8020e+04    | 1.6770e+03 | 5.7141e+05    |
| C13 | 4.9038e+03      | 1.2089e+04 | 3.8020e+04    | 1.6770e+03 | 5.7141e+05    |
| C23 | 3.7542e+03      | 1.1009e+04 | 3.7837e+04    | 1.3672e+03 | 5.7667e+05    |
